# Supplementary material for: Impact of soft protein interactions on the excretion, extent of receptor occupancy and tumor accumulation of ultrasmall metal nanoparticles: a compartmental model simulation
Source: Royal Society of Chemistry journal article supplement (doi:10.1039/c9ra04718b), 2019-01-01
Supplement: c9ra04718b1.pdf [file c9ra04718b1.pdf]

## **Supplementary Information for:**

**Impact of soft protein interactions on the excretion, extent of receptor occupancy and tumor accumulation of ultras-small metal nanoparticles:  
a compartmental model simulation**

**Alioscka A. Sousa**

**Department of Biochemistry, Federal University of São Paulo, São Paulo, SP, Brazil.**

**[alioscka.sousa@unifesp.br](mailto:alioscka.sousa@unifesp.br)**

## Ordinary differential equations for Model 1.

The ODEs below pertain to Model 1 as described in Fig. 1a. The ODEs can be easily modified to reflect the different NP-protein stoichiometries used in the actual simulations (see Eqs. 1 and 2). The ODEs are solved numerically given the rate constants and initial boundary conditions as specified under *Section 2.1–Parameter values*. Numerical integration was performed with the program Polymath (<http://www.polymath-software.com>).

$$d[NP]/dt = -2k_{on,P}[NP][P] + k_{off,P}[NP \cdot P_1] - k_{on,R}[NP][R] + k_{off,R}[NP \cdot R] - k_{clear0}[NP]$$

$$d[P]/dt = -2k_{on,P}[NP][P] + k_{off,P}[NP \cdot P_1] - k_{on,P}[NP \cdot P_1][P] + 2k_{off,P}[NP \cdot P_2]$$

$$d[NP \cdot P_1]/dt = 2k_{on,P}[NP][P] - k_{off,P}[NP \cdot P_1] - k_{on,P}[NP \cdot P_1][P] + 2k_{off,P}[NP \cdot P_2] - k_{on,R}[NP \cdot P_1][R] + k_{off,R}[NP \cdot P_1 \cdot R] - k_{clear1}[NP \cdot P_1]$$

$$d[NP \cdot P_2]/dt = k_{on,P}[NP \cdot P_1][P] - 2k_{off,P}[NP \cdot P_2] - k_{clear2}[NP \cdot P_2]$$

$$d[R]/dt = -k_{on,R}[NP][R] + k_{off,R}[NP \cdot R] - k_{on,R}[NP \cdot P_1][R] + k_{off,R}[NP \cdot P_1 \cdot R]$$

$$d[NP \cdot R]/dt = k_{on,R}[NP][R] - k_{off,R}[NP \cdot R]$$

$$d[NP \cdot P_1 \cdot R]/dt = k_{on,R}[NP \cdot P_1][R] - k_{off,R}[NP \cdot P_1 \cdot R]$$

$$d[NP_{out}]/dt = k_{clear0}[NP] + k_{clear1}[NP \cdot P_1] + k_{clear2}[NP \cdot P_2]$$

## Ordinary differential equations for Model 2.

The ODEs below pertain to Model 2 as described in Fig. 1b. The ODEs can be easily modified to reflect the different NP-protein stoichiometries used in the actual simulations. The ODEs are solved numerically given the rate constants and initial boundary conditions as specified under *Section 2.2–Parameter values*. Numerical integration was performed with the program Polymath.

$$d[NP]/dt = -2k_{on,P}[NP][P] + k_{off,P}[NP \cdot P_1] - k_{PT0}[NP] + (V_T/V_P) \times k_{TP0}[NP^T] - k_{clear0}[NP]$$

$$d[P]/dt = -2k_{on,P}[NP][P] + k_{off,P}[NP \cdot P_1] - k_{on,P}[NP \cdot P_1][P] + 2k_{off,P}[NP \cdot P_2]$$

$$d[NP \cdot P_1]/dt = 2k_{on,P}[NP][P] - k_{off,P}[NP \cdot P_1] - k_{on,P}[NP \cdot P_1][P] + 2k_{off,P}[NP \cdot P_2] - k_{PT1}[NP \cdot P_1] + (V_T/V_P) \times k_{TP1}[NP^T \cdot P_1^T] - k_{clear1}[NP \cdot P_1]$$

$$d[NP \cdot P_2]/dt = k_{on,P}[NP \cdot P_1][P] - 2k_{off,P}[NP \cdot P_2] - k_{PT2}[NP \cdot P_2] + (V_T/V_P) \times k_{TP2}[NP^T \cdot P_2^T] - k_{clear2}[NP \cdot P_2]$$

$$d[NP^T]/dt = -2k_{on,P}[NP^T][P^T] + k_{off,P}[NP^T \cdot P_1^T] + (V_P/V_T) \times k_{PT0}[NP] - k_{TP0}[NP^T]$$

$$d[P^T]/dt = -2k_{on,P}[NP^T][P^T] + k_{off,P}[NP^T \cdot P_1^T] - k_{on,P}[NP^T \cdot P_1^T][P^T] + 2k_{off,P}[NP^T \cdot P_2^T]$$

$$d[NP^T \cdot P_1^T]/dt = 2k_{on,P}[NP^T][P^T] - k_{off,P}[NP^T \cdot P_1^T] - k_{on,P}[NP^T \cdot P_1^T][P^T] + 2k_{off,P}[NP^T \cdot P_2^T] + (V_P/V_T) \times k_{PT1}[NP \cdot P_1] - k_{TP1}[NP^T \cdot P_1^T]$$

$$d[NP^T \cdot P_2^T]/dt = k_{on,P}[NP^T \cdot P_1^T][P^T] - 2k_{off,P}[NP^T \cdot P_2^T] + (V_P/V_T) \times k_{PT2}[NP \cdot P_2] - k_{TP2}[NP^T \cdot P_2^T]$$

$$d[NP_{out}]/dt = k_{clear0}[NP] + k_{clear1}[NP \cdot P_1] + k_{clear2}[NP \cdot P_2]$$

where  $V_P$  and  $V_T$  denote the volumes of the plasma and tumor compartments, respectively. As the ratio  $V_P/V_T$  represents only a scaling factor, an arbitrary value of 1 is assumed for simplicity.

**Table S1. Experimental plasma clearance data for ultrasmall metal NPs.**

| Entry | NP core            | NP coating | HD (nm) | $t_{1/2\alpha}$ (min) | $t_{1/2\beta}$ (h) | %ID in urine at 24 h p.i. <sup>4</sup> | Ref. |
|-------|--------------------|------------|---------|-----------------------|--------------------|----------------------------------------|------|
| 1     | Ag <sup>1</sup>    | GSH        | 3.1     | 1.6                   | 22.2               | 51                                     | [1]  |
| 2     | Ag-Au <sup>1</sup> | GSH        | 3.1     | 2.4                   | 21.4               | 53                                     | [1]  |
| 3     | Ag-Au <sup>1</sup> | GSH        | 3.1     | 3.5                   | 20.3               | 49                                     | [1]  |
| 4     | Au <sup>1</sup>    | GSH        | 3.1     | 5.1                   | 16.5               | 46                                     | [1]  |
| 5     | Au                 | PEG        | 5.5     | 56.1                  | 9.2                | ~ 55                                   | [2]  |
| 6     | Au                 | GSH        | 3.3     | 5.4                   | 8.5                | ~ 55                                   | [2]  |
| 7     | Au <sup>2</sup>    | GSH        | ~ 1     | 7.1                   | 11.2               | 19                                     | [3]  |
| 8     | Au <sup>2</sup>    | GSH        | ~ 1     | 11.5                  | 9.5                | 23                                     | [3]  |
| 9     | Au <sup>2</sup>    | GSH        | ~ 1     | 4.9                   | 10.3               | 27                                     | [3]  |
| 10    | Au <sup>2</sup>    | GSH        | ~ 1     | 4.5                   | 12.3               | 52                                     | [3]  |
| 11    | Au                 | Gly-Cys    | 3.1     | 2.5                   | 4.3                | 42                                     | [4]  |
| 12    | Au                 | Cys        | 2.7     | 3.2                   | 4.9                | 21                                     | [4]  |
| 13    | Au                 | GSH        | 3.0     | 5.0                   | 12.7               | ~ 45                                   | [5]  |
| 14    | Au <sup>3</sup>    | GSH        | 3.3     | 3.5                   | 7.0                | 39                                     | [6]  |
| 15    | Au <sup>3</sup>    | GSH        | 3.3     | 2.6                   | 3.3                | 43                                     | [6]  |
| 16    | Au <sup>3</sup>    | GSH        | 3.3     | 1.5                   | 0.79               | 71                                     | [6]  |
| 17    | Au                 | GSH        | 3.0     | 0.73                  | 8.1                | 52                                     | [7]  |

1. NPs of different core compositions but same surface coating. The Ag:Au ratios are (from top to bottom): 1:0, 8.4:1, 0.64:1 and 0:1.
2. Atomically precise nanoclusters with formulas Au<sub>10-11</sub>GSH<sub>10-11</sub>, Au<sub>15</sub>GSH<sub>13</sub>, Au<sub>18</sub>GSH<sub>14</sub> and Au<sub>25</sub>GSH<sub>18</sub> (from top to bottom). Here the  $t_{1/2\alpha}$  and  $t_{1/2\beta}$  were calculated by fitting of Eq. 3 to the data provided in the Supplementary Table 3 in ref. [3].
3. Pharmacokinetic data was recorded using the same NPs under different injection doses. Here the  $t_{1/2\alpha}$  and  $t_{1/2\beta}$  were calculated from the data provided in the Supplementary Fig. S7 in ref. [6].
4. Values of %ID in the urine are included for reference. Entries 1-4: %ID at 48 h p.i.

**Table S2. Experimental plasma clearance data for some protein drugs.** Selected proteins cover a range of molecular weights from 7 to 80 KDa. Clearance data for smaller molecular tracers (first two rows) and larger proteins (last three rows) are also shown for comparison.

| Molecule                | MW (KDa) | HD (nm) <sup>1</sup> | $t_{1/2\alpha}$ (min) | $t_{1/2\beta}$ (h) | Ref. |
|-------------------------|----------|----------------------|-----------------------|--------------------|------|
| <sup>177</sup> Lu-DOTA  | 0.58     | 1.5                  | 0.17                  | 0.34               | [8]  |
| IR Dye                  | 1.1      | 1.9                  | 6.3                   | 0.98               | [9]  |
| Affibody                | 7        | 3.5                  | 14.7                  | 23                 | [10] |
| Affibody dimer          | 15.6     | 4.5                  | 13.4                  | 5.8                | [10] |
| scFv                    | 27       | 5.5                  | 12.9                  | 6.3                | [10] |
| scFv                    | 28       | 5.5                  | 5                     | 4                  | [11] |
| scDb                    | 54.5     | 6.9                  | 10.2                  | 5.6                | [12] |
| scFv dimer              | 55       | 6.9                  | 35.4                  | 13.8               | [10] |
| taFv                    | 56       | 7.0                  | 9                     | 26                 | [11] |
| Minibody                | 80       | 7.8                  | 62.7                  | 9.9                | [10] |
| scDb-PEG40 <sup>2</sup> | 95       | 8.3                  | 31                    | 13                 | [12] |
| taFv-HSA <sup>3</sup>   | 121      | 9.0                  | 37                    | 40                 | [11] |
| IgG                     | 145      | 9.5                  | 43.8                  | 39                 | [12] |

1. The hydrodynamic diameter (HD) of all molecules was estimated as  $HD = 1.82 * MW^{0.333}$  for consistency (ref. [10])
2. PEGylated recombinant diabody
3. Recombinant antibody-albumin fusion protein

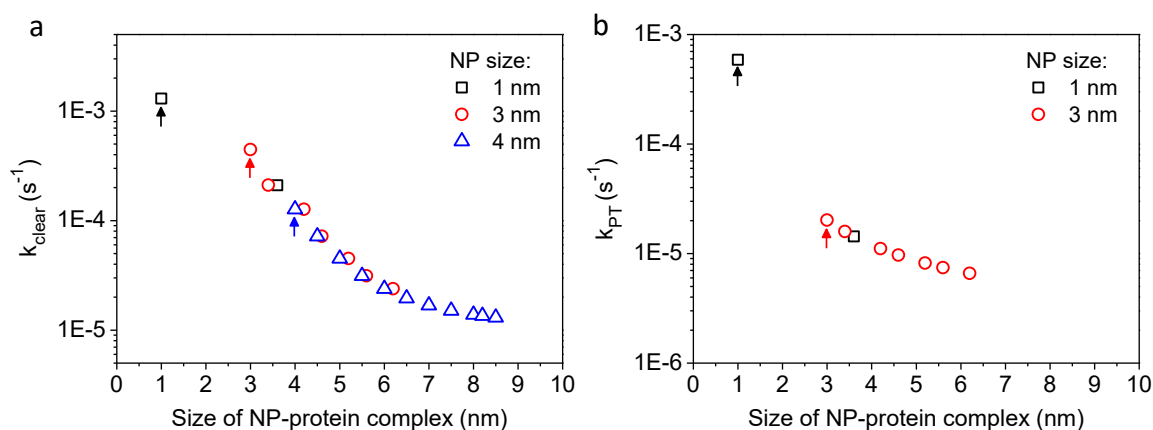

**Figure S1. Systemic clearance (a) and vascular extravasation (b) rates for NPs and NP-protein complexes as a function of compound size.** Sizes were calculated according to Eqs. 1 and 2, whereas  $k_{clear}$  and  $k_{PT}$  were estimated with Eqs. 5 and 9, respectively. NPs of 1, 3 and 4 nm in size have maximum binding capacities of 1, 6 and 10 plasma proteins, respectively. Naked NPs are indicated with arrows.

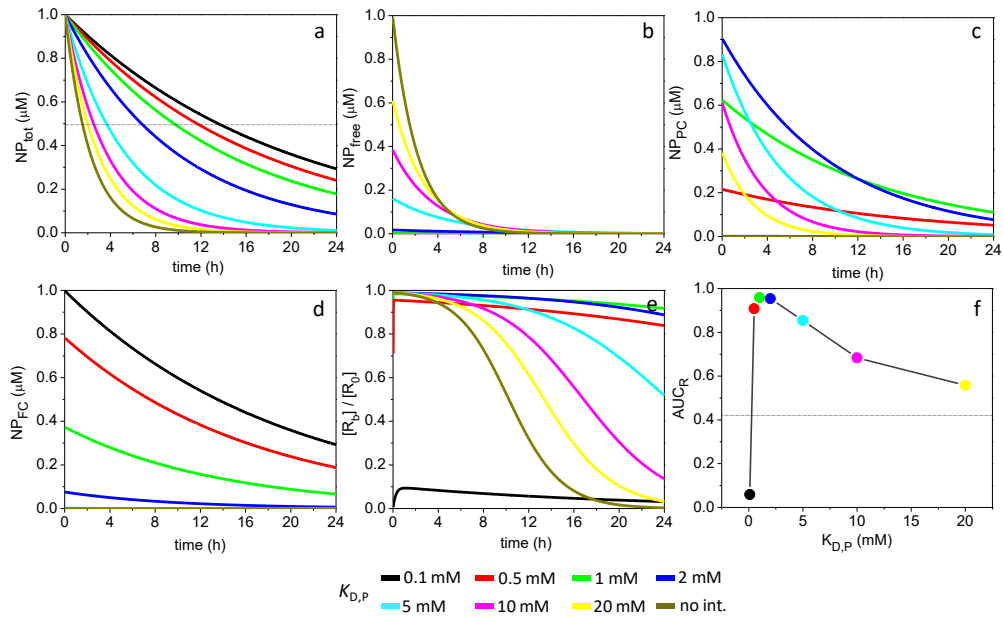

**Figure S2. Time course of NP species in the compartment and extent of receptor occupancy for Sim #2.** (a) Time course of  $NP_{tot}$ . The half-life for systemic clearance of  $NP_{tot}$  for each value of  $K_{D,P}$  is given by the intercept of the dashed line with each corresponding decay curve. (b) Time course of  $NP_{free}$ . (c) Time course of  $NP_{PC}$ . (d) Time course of  $NP_{FC}$ . (e) Receptor occupancy as a function of time. (f) Area under the curve for receptor occupancy as a function of  $K_{D,P}$ ; calculated from e) with Eq. 7. Dashed line marks the calculated value of  $AUC_R$  (0.43) in the absence of soft interactions.

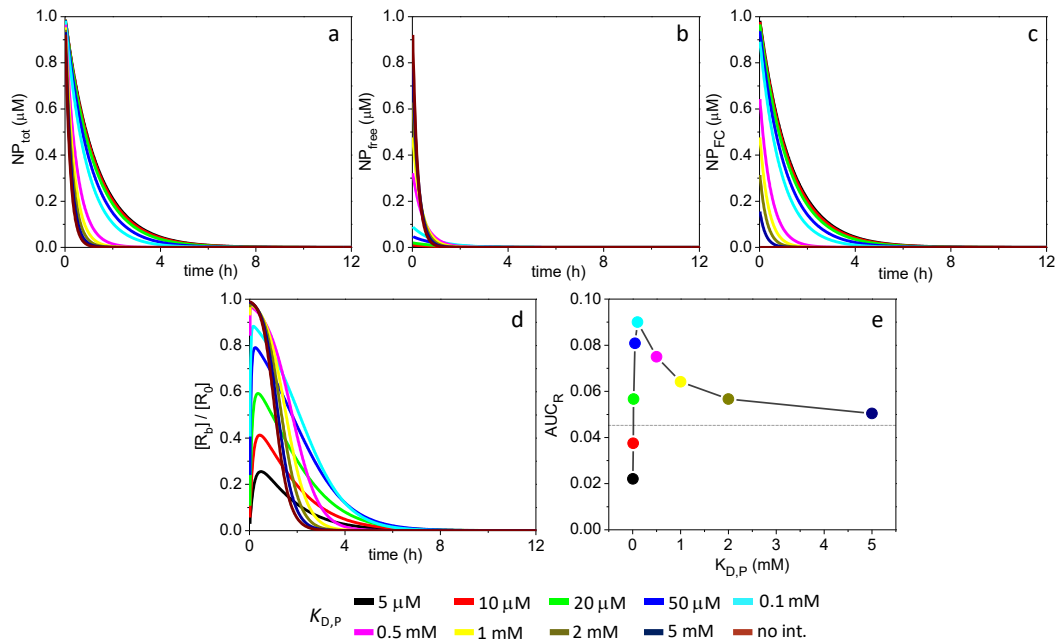

**Figure S3. Time course of NP species in the compartment and extent of receptor occupancy for Sim #3.** (a) Time course of  $NP_{tot}$ . (b) Time course of  $NP_{free}$ . (c) Time course of  $NP_{FC}$ . (d) Receptor occupancy as a function of time. (e) Area under the curve for receptor occupancy as a function of  $K_{D,P}$ ; calculated from d) with Eq. 7. Dashed line marks the calculated value of  $AUC_R$  (0.046) in the absence of soft interactions.

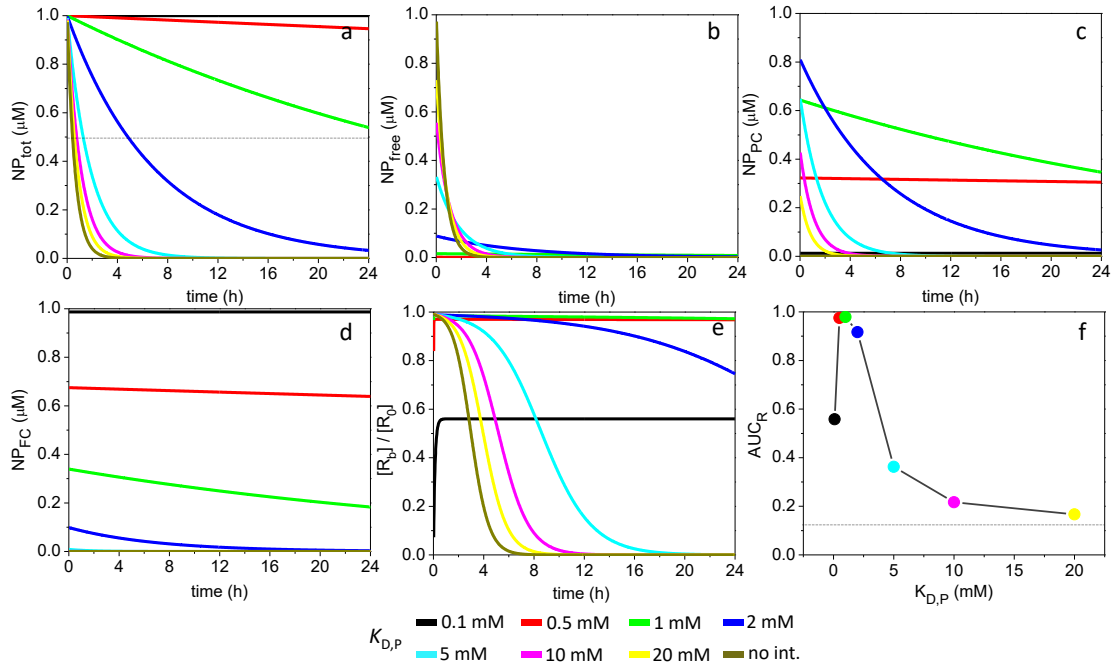

**Figure S4. Time course of NP species in the compartment and extent of receptor occupancy for Sim #4.** (a) Time course of  $NP_{tot}$ . The half-life for systemic clearance of  $NP_{tot}$  for each value of  $K_{D,P}$  is given by the intercept of the dashed line with each corresponding decay curve. (b) Time course of  $NP_{free}$ . (c) Time course of  $NP_{PC}$ . (d) Time course of  $NP_{FC}$ . (e) Receptor occupancy as a function of time. (f) Area under the curve for receptor occupancy as a function of  $K_{D,P}$ ; calculated from e) with Eq. 7. Dashed line marks the calculated value of  $AUC_R$  (0.12) in the absence of soft interactions.

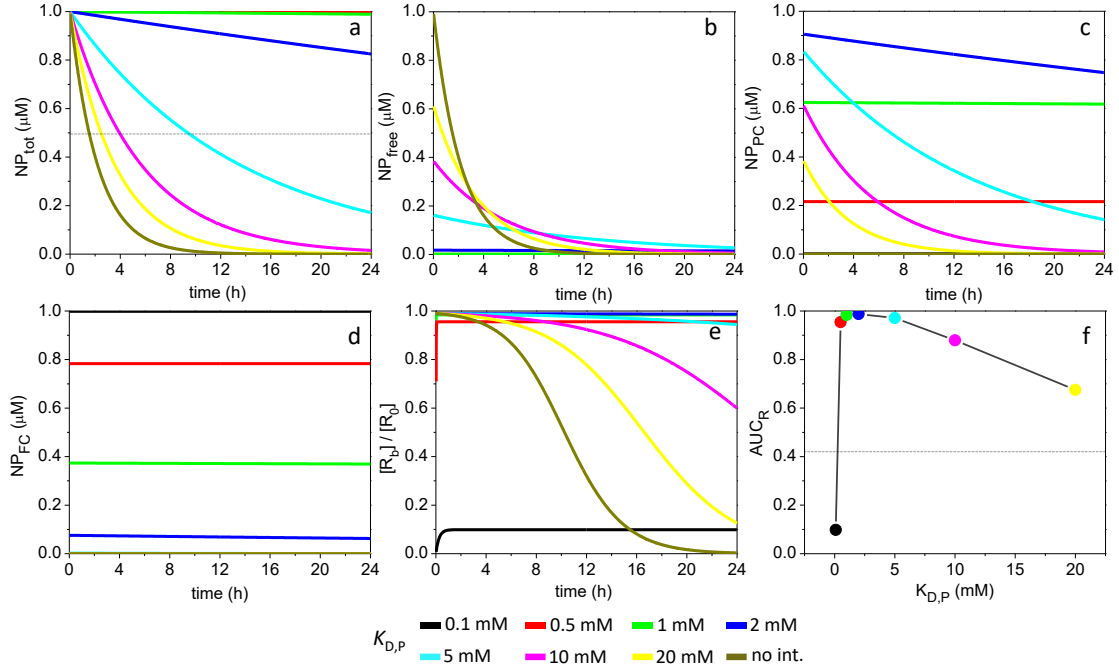

**Figure S5. Time course of NP species in the compartment and extent of receptor occupancy for Sim #5.** (a) Time course of  $NP_{tot}$ . The half-life for systemic clearance of  $NP_{tot}$  for each value of  $K_{D,P}$  is given by the intercept of the dashed line with each corresponding decay curve. (b) Time course of  $NP_{free}$ . (c) Time course of  $NP_{PC}$ . (d) Time course of  $NP_{FC}$ . (e) Receptor occupancy as a function of time. (f) Area under the curve for receptor occupancy as a function of  $K_{D,P}$ ; calculated from e) with Eq. 7. Dashed line marks the calculated value of  $AUC_R$  (0.43) in the absence of soft interactions.

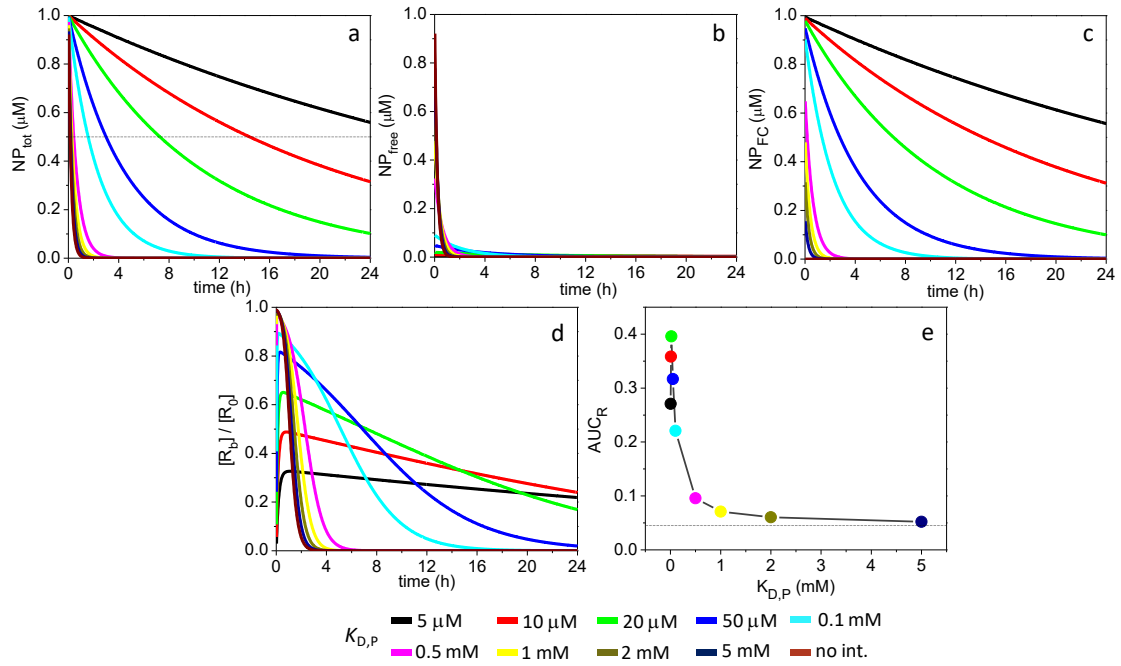

**Figure S6. Time course of NP species in the compartment and extent of receptor occupancy for Sim #6.** (a) Time course of  $NP_{tot}$ . The half-life for systemic clearance of  $NP_{tot}$  for each value of  $K_{D,P}$  is given by the intercept of the dashed line with each corresponding decay curve. (b) Time course of  $NP_{free}$ . (c) Time course of  $NP_{FC}$ . (d) Receptor occupancy as a function of time. (e) Area under the curve for receptor occupancy as a function of  $K_{D,P}$ ; calculated from d) with Eq. 7. Dashed line marks the calculated value of  $AUC_R$  (0.046) in the absence of soft interactions.

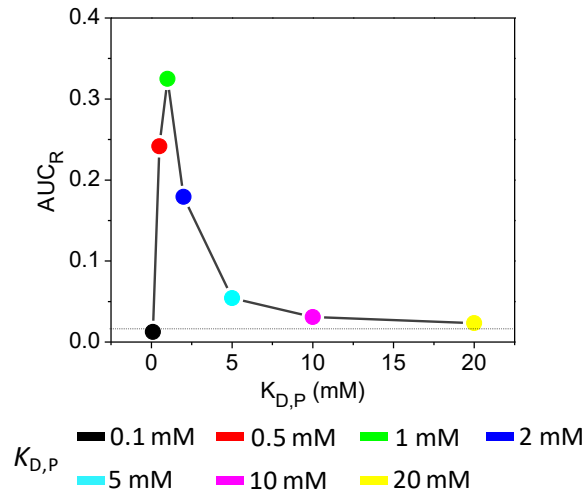

**Figure S7. Extent of receptor occupancy assuming the model parameters in Sim #7.** Area under the curve for receptor occupancy as a function of  $K_{D,P}$ . Dashed line marks the calculated value of  $AUC_R$  (0.018) in the absence of soft interactions.



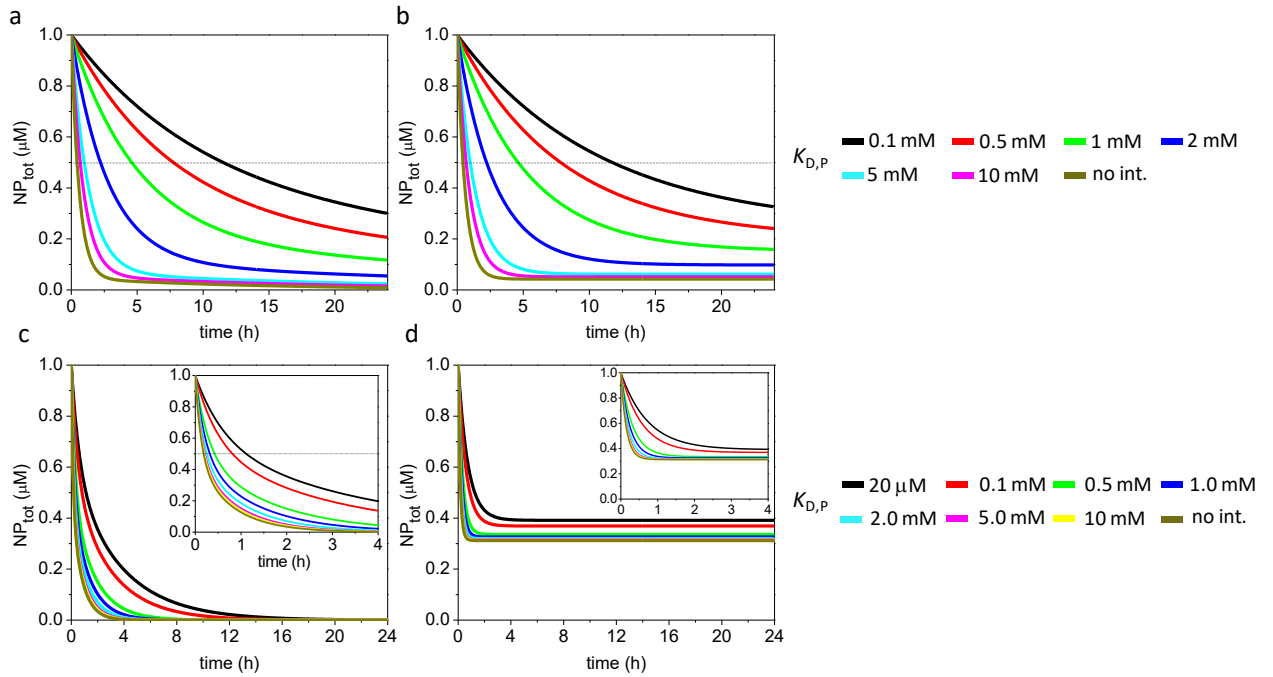

**Figure S8. Time course of  $NP_{tot}$  assuming the model parameters in *Sim #9* (a), *#10* (b), *#11* (c) and *#12* (d).** Half-life for systemic clearance of  $NP_{tot}$  for each value of  $K_{D,P}$  is given by the intercept of the dashed line with each corresponding decay curve. In d), the  $NP_{tot}$  concentration does not fall down to 'zero' because a significant amount of NPs that have extravasated remain trapped in the peripheral compartment.

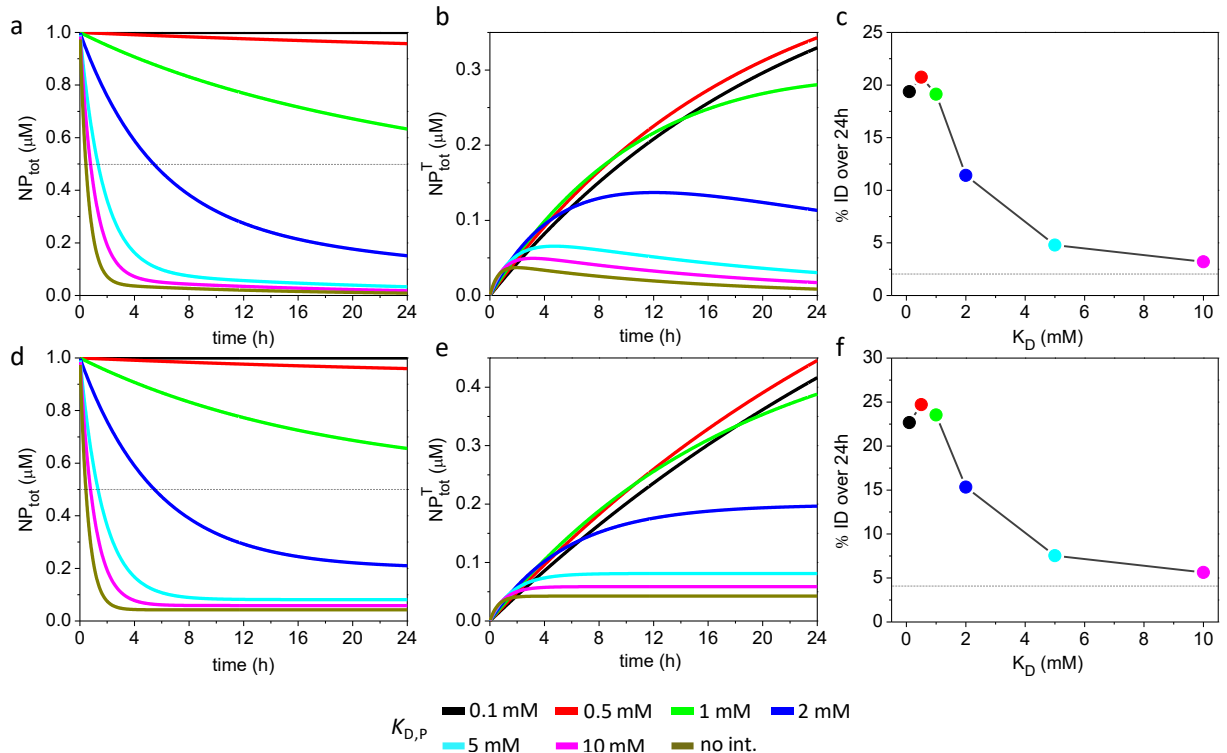

**Figure S9. Time course of NP species and %ID assuming the model parameters in *Sim #13* and *#14*.** (a) Time course of  $NP_{tot}$ , (b) time course of  $NP^T_{tot}$ , and (c) %ID as a function of  $K_{D,P}$  for *Sim #13*. (d,e,f) Same for *Sim #14*. Values of %ID were calculated from b) and e) with Eq. 10. Half-life for systemic clearance of  $NP_{tot}$  for each value of  $K_{D,P}$  is given by the intercept of the dashed line with each corresponding decay curve in a) and d). Dashed lines in c) and f) mark the calculated values of %ID (2 and 4.2%) in the absence of soft interactions.

## References

1. S. Tang, C. Peng, J. Xu, B. Du, Q. Wang, R. D. Vinluan III, M. Yu, M. J. Kim and J. Zheng, *Angew. Chem. Int. Ed.*, 2016, **128**, 16273-16277.
2. J. Liu, M. Yu, X. Ning, C. Zhou, S. Yang and J. Zheng, *Angew. Chem. Int. Ed.*, 2013, **52**, 12572-12576.
3. B. Du, X. Jiang, A. Das, Q. Zhou, M. Yu, R. Jin and J. Zheng, *Nat. Nanotech.*, 2017, **12**, 1096.
4. X. Ning, C. Peng, E. S. Li, J. Xu, R. D. Vinluan III, M. Yu and J. Zheng, *APL Materials*, 2017, **5**, 053406.
5. C. Zhou, G. Hao, P. Thomas, J. Liu, M. Yu, S. Sun, O. K. Öz, X. Sun and J. Zheng, *Angew. Chem. Int. Ed.*, 2012, **51**, 10118-10122.
6. J. Xu, M. Yu, C. Peng, P. Carter, J. Tian, X. Ning, Q. Zhou, Q. Tu, G. Zhang and A. Dao, *Angew. Chem. Int. Ed.*, 2018, **57**, 266-271.
7. C. Peng, X. Gao, J. Xu, B. Du, X. Ning, S. Tang, R. M. Bachoo, M. Yu, W.-P. Ge and J. Zheng, *Nano Res.*, 2017, **10**, 1366-1376.
8. K. D. Orcutt, K. A. Nasr, D. G. Whitehead, J. V. Frangioni and K. D. Wittrup, *Mol. Imag. Biol.*, 2011, **13**, 215-221.
9. J. Liu, M. Yu, C. Zhou, S. Yang, X. Ning and J. Zheng, *J. Am. Chem. Soc.*, 2013, **135**, 4978-4981.
10. M. M. Schmidt and K. D. Wittrup, *Mol. Cancer Ther.*, 2009, **8**, 2861-2871.
11. D. Müller, A. Karle, B. Meißburger, I. Höfig, R. Stork and R. E. Kontermann, *J. Biol. Chem.*, 2007, **282**, 12650-12660.
12. R. Stork, K. A. Zettlitz, D. Müller, M. Rether, F.-G. Hanisch and R. E. Kontermann, *J. Am. Chem. Soc.*, 2008, **283**, 7804-7812.
